# Supplementary material for: Interaction of lncRNA MIR100HG with hnRNPA2B1 facilitates m6A-dependent stabilization of TCF7L2 mRNA and colorectal cancer progression
Source: PubMed Central journal article supplement (PMC8917698; doi:10.1186/s12943-022-01555-3), 2022-03-12

# Supplementary figure 1

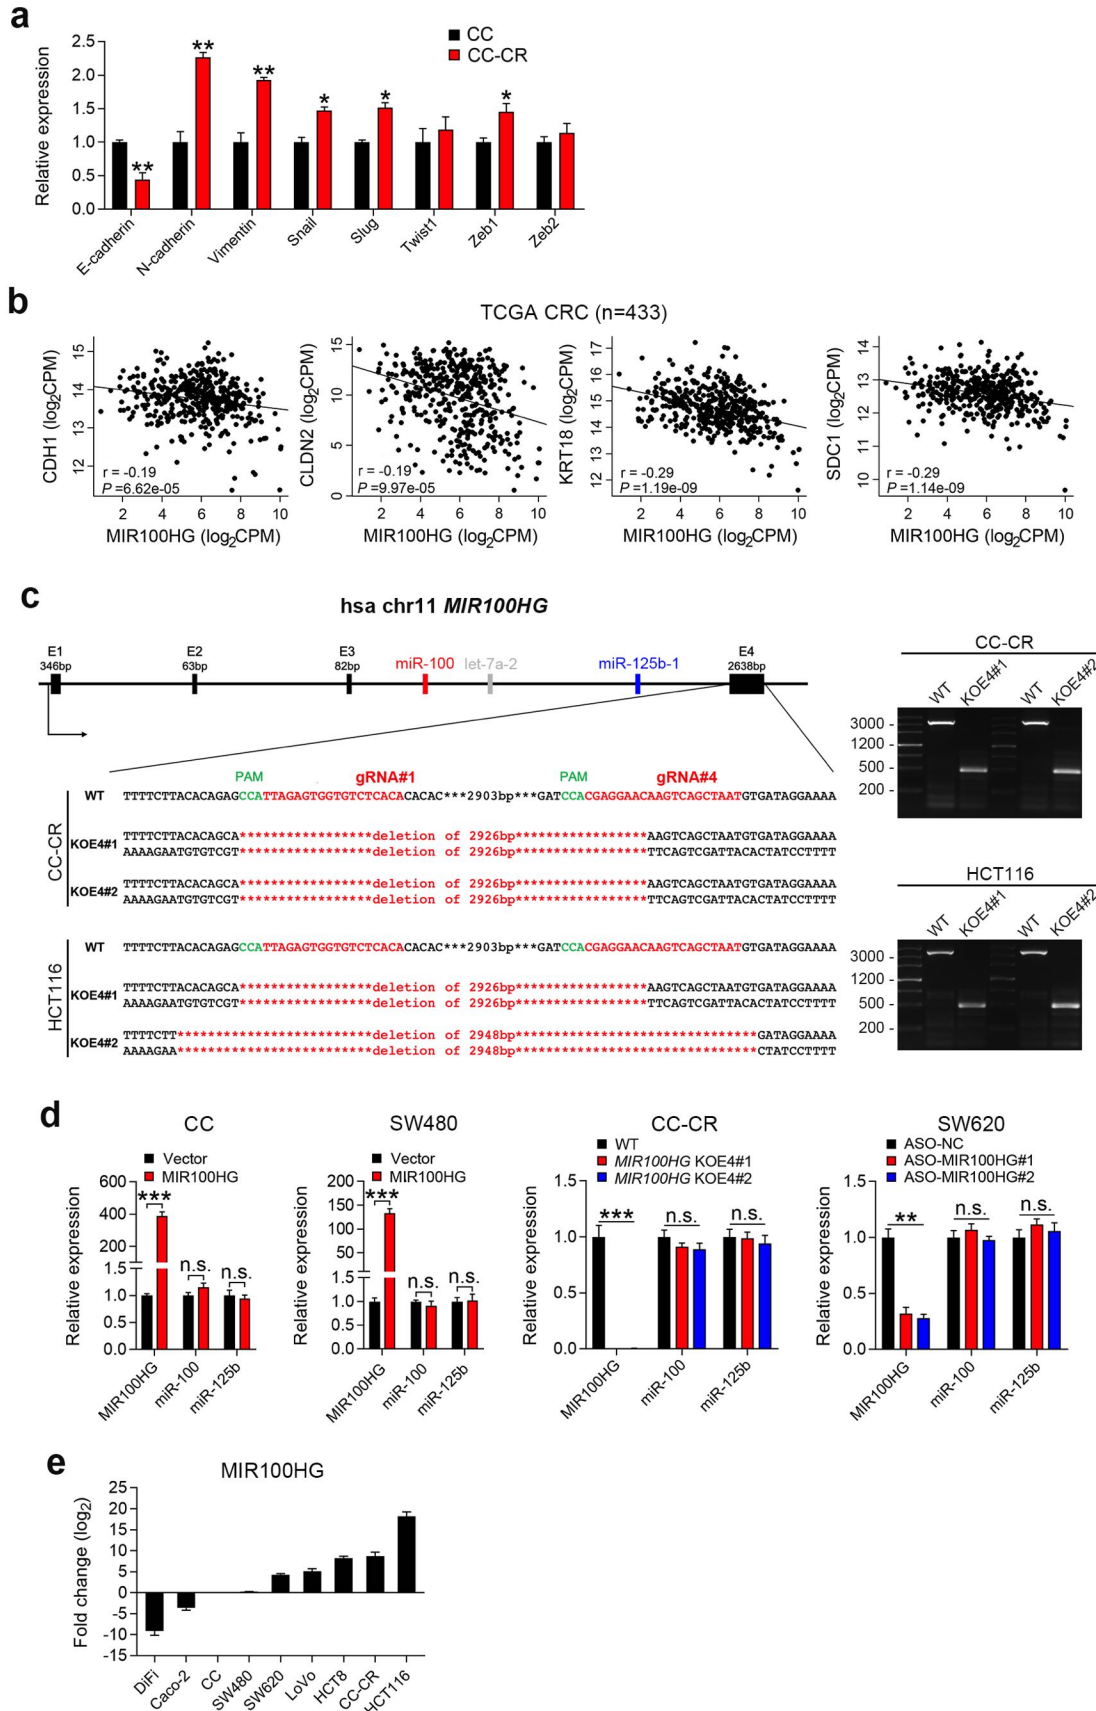

# Supplementary figure 2

**a**

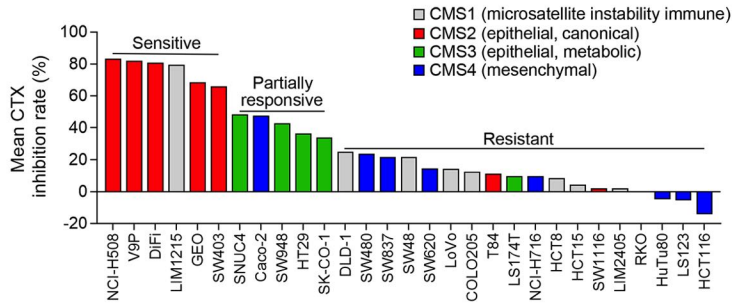

**b**

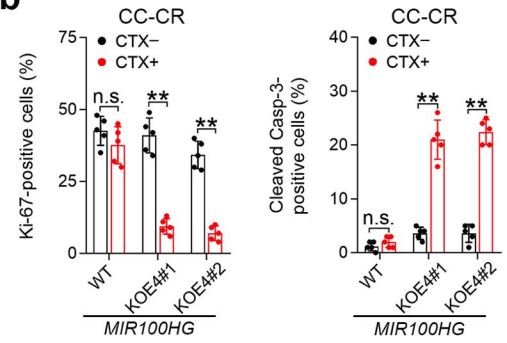

**c**

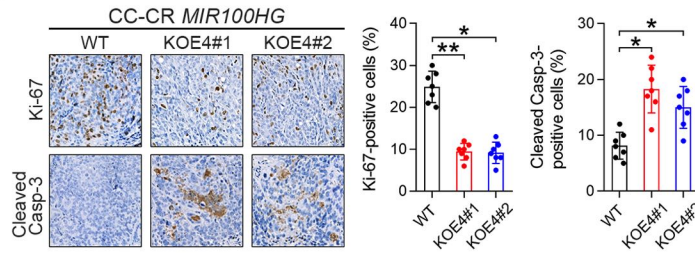

**d**

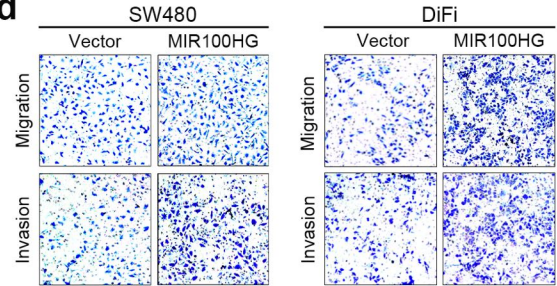

**e**

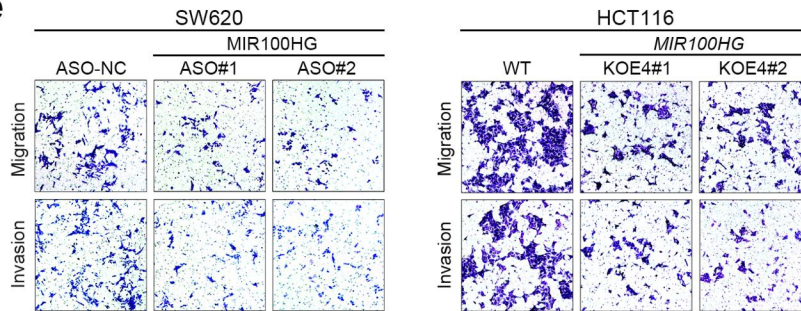

**f**

Incidence of lung metastasis in transplanted nude mice

|                     | metastasis |
|---------------------|------------|
| SW620 shNC          | 8/10       |
| SW620 shMIR100HG#1  | 2/10       |
| SW620 shMIR100HG #2 | 3/10       |
| LoVo shNC           | 9/10       |
| LoVo shMIR100HG#1   | 3/10       |
| LoVo shMIR100HG#2   | 4/10       |

# Supplementary figure 3

**a**

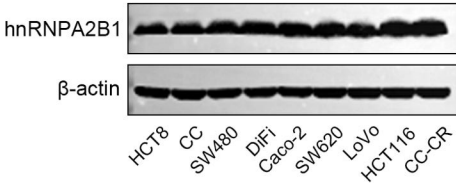

**b**

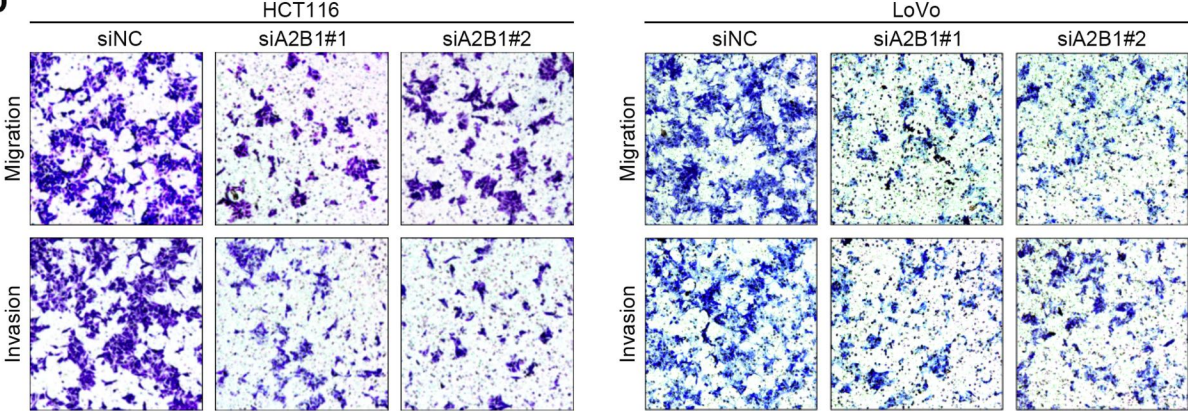

**c**

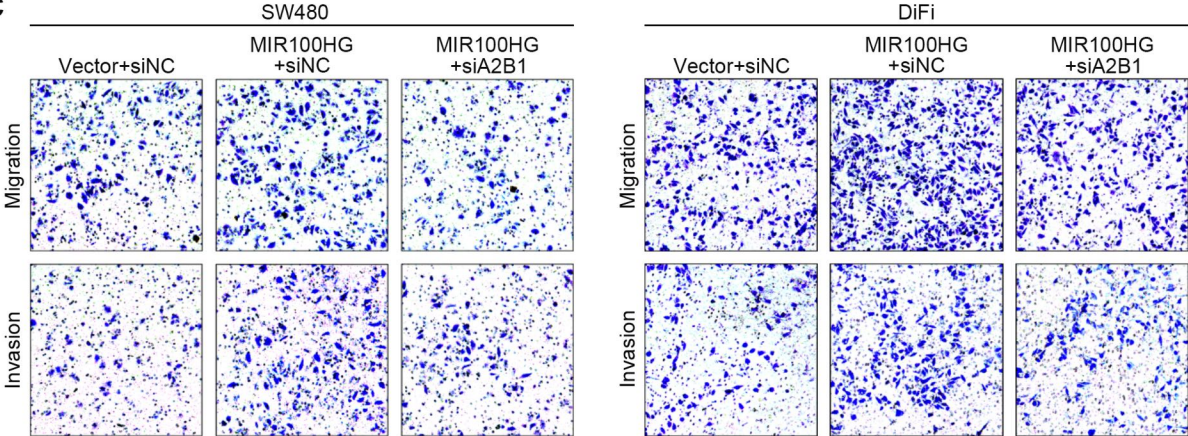



# Supplementary figure 4

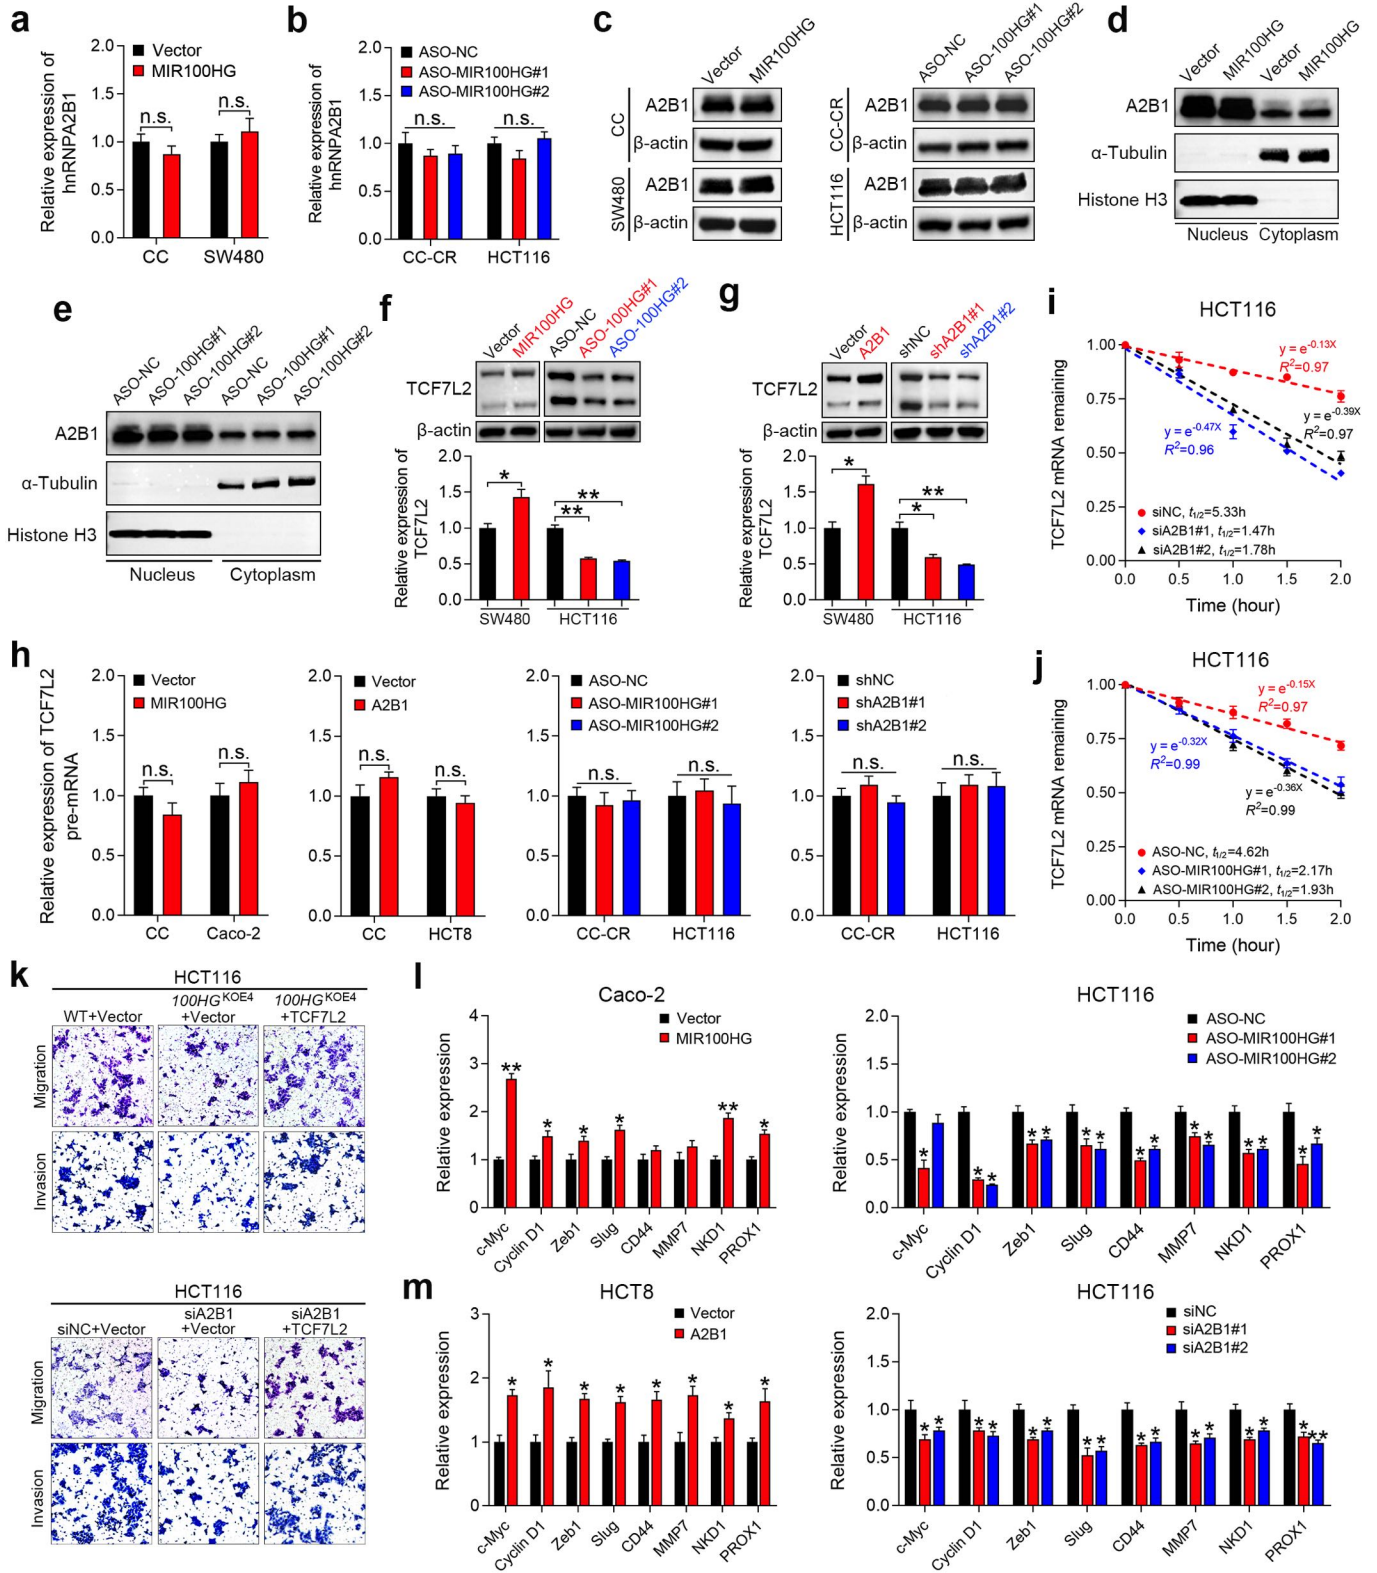

# Supplementary figure 5

a

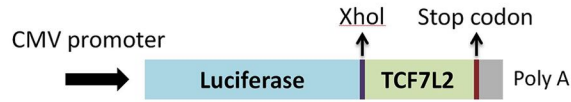

TCF7L2-WT (2482-2744):

5' ...aactgttatgtagttcggatagcttagttttaaagactgattaaaaacaaaagaaaaaaaaagc... 3'

TCF7L2-mut:

5' ...aactgttatgtagttcggatagcttagttttaaagtctgattaaaaacaaaagaaaaaaaaagc... 3'

b

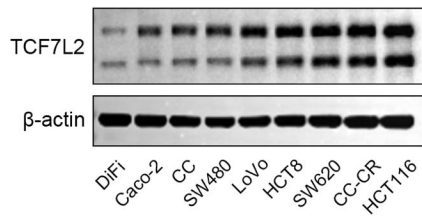

c

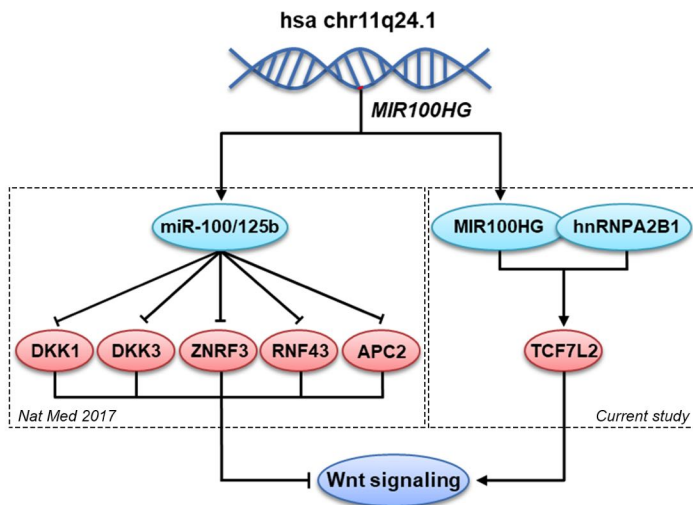

# Supplementary figure 6

## Figure 1c

3D

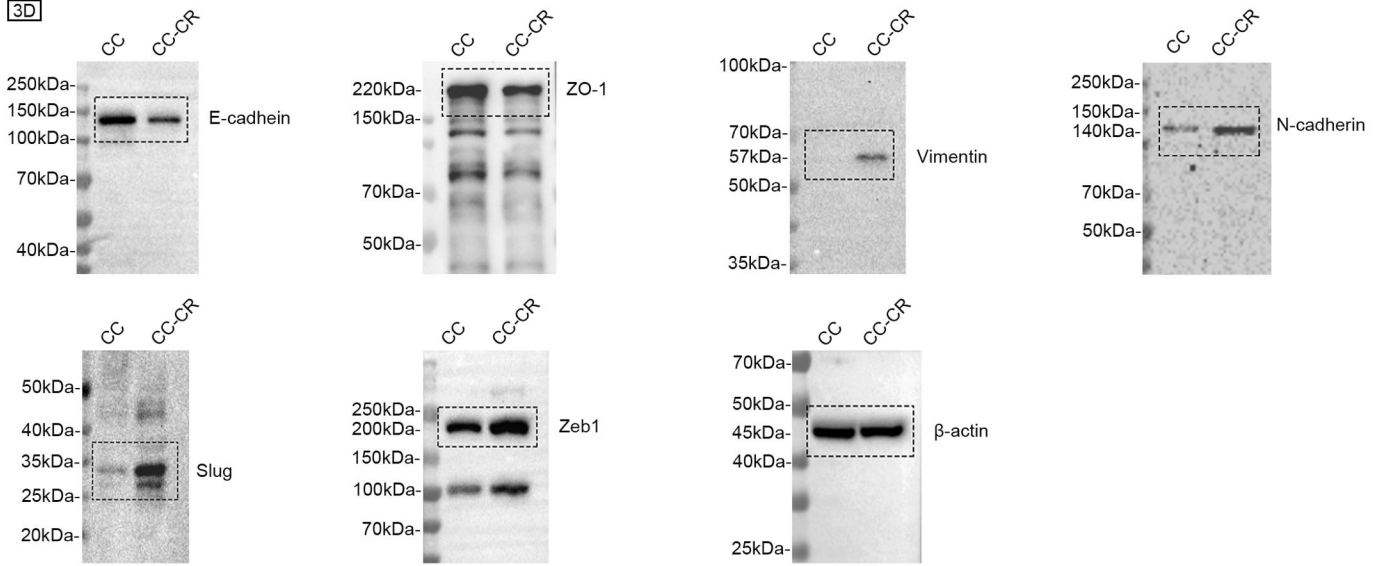

## Figure 1h

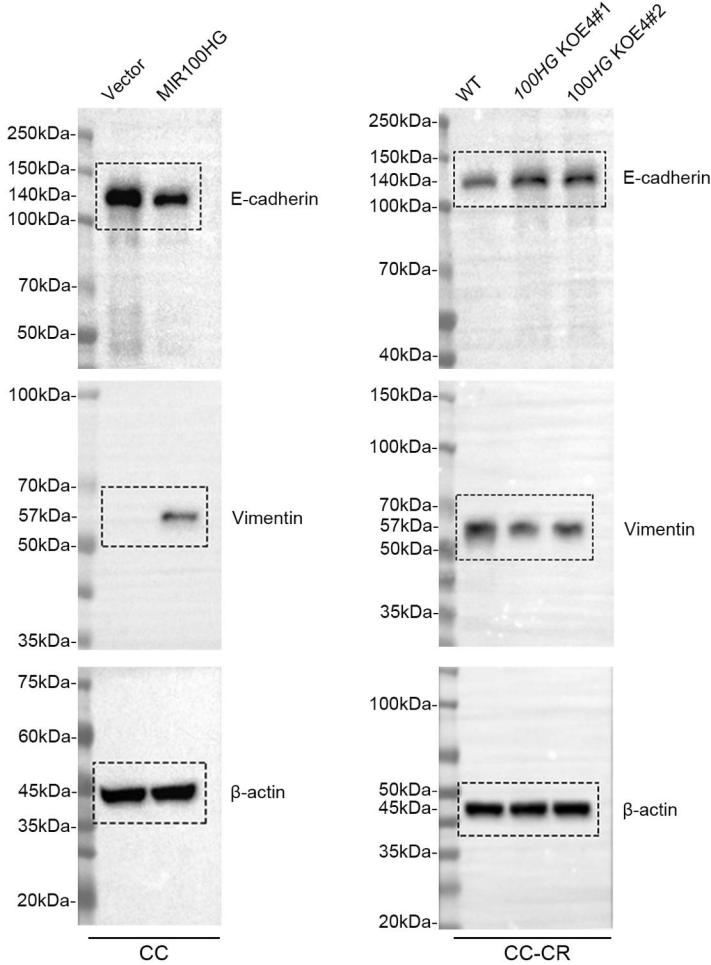

## Figure 1j

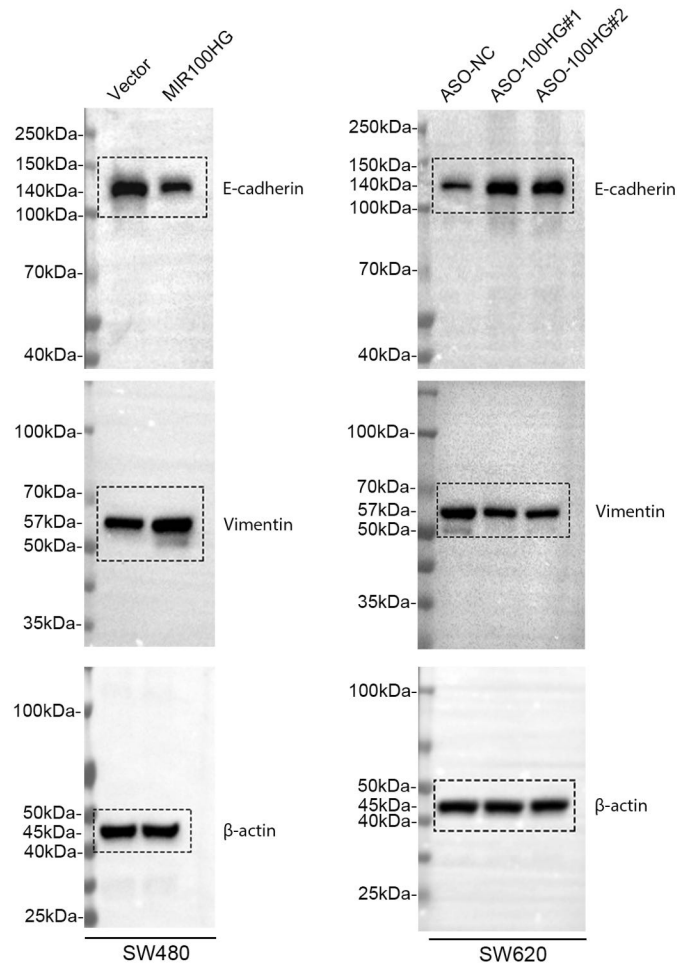

**Figure 3a**

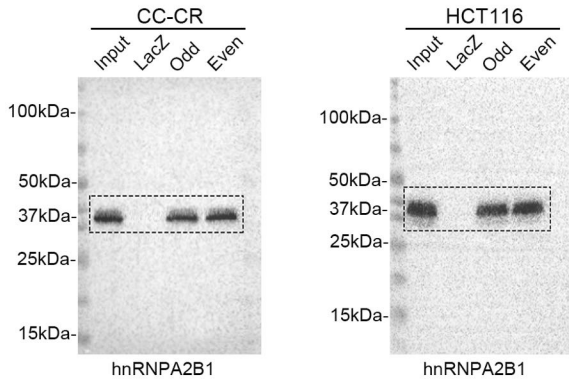

**Figure 3b**

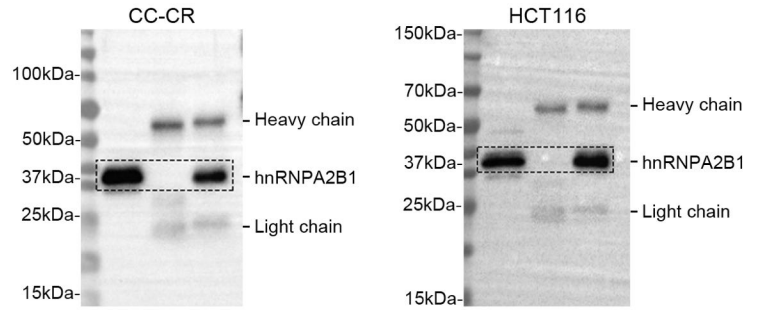

**Figure 3d**

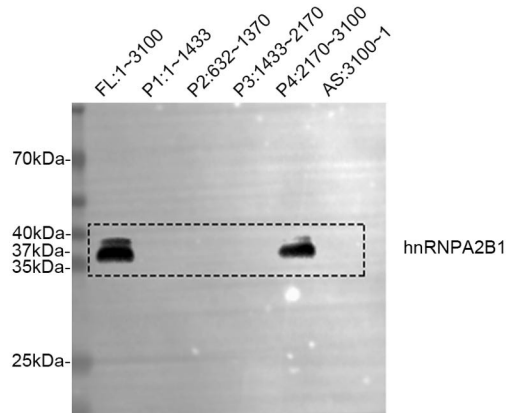

**Figure 3g**

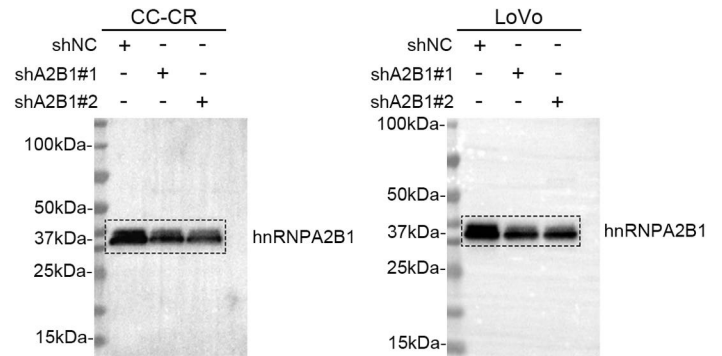

**Figure 3j**

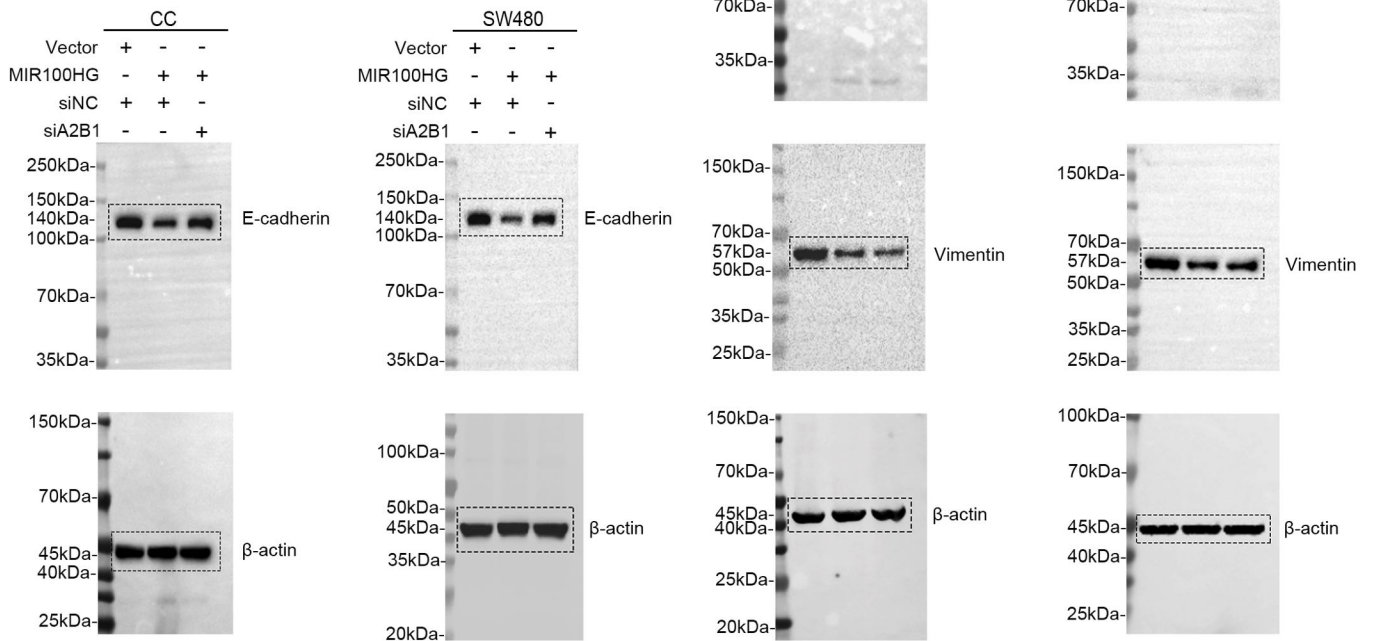

**Figure 4b**

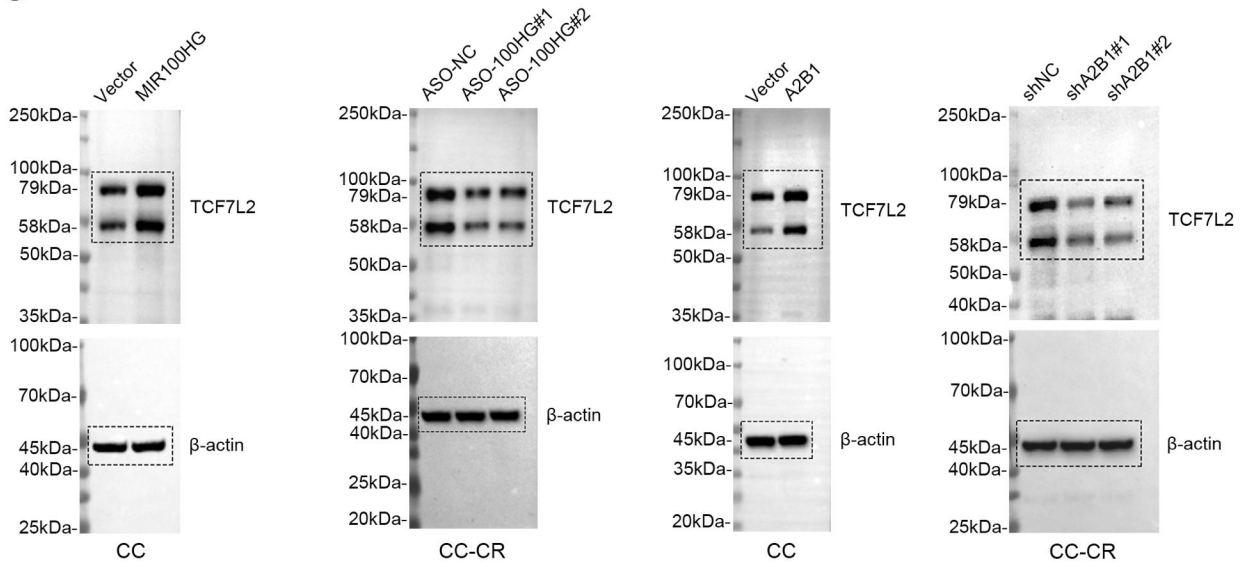

**Figure 4h**

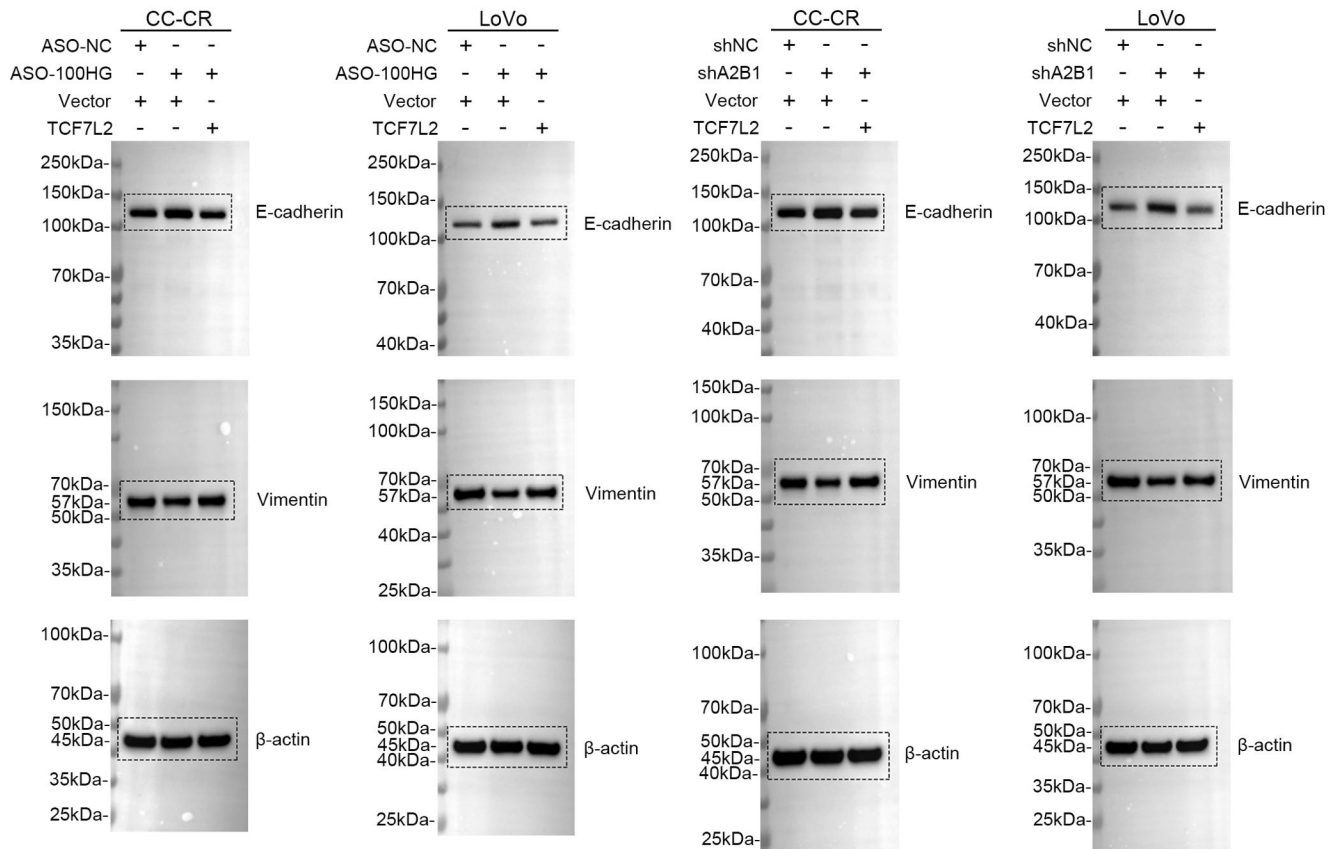



**Figure 5a**

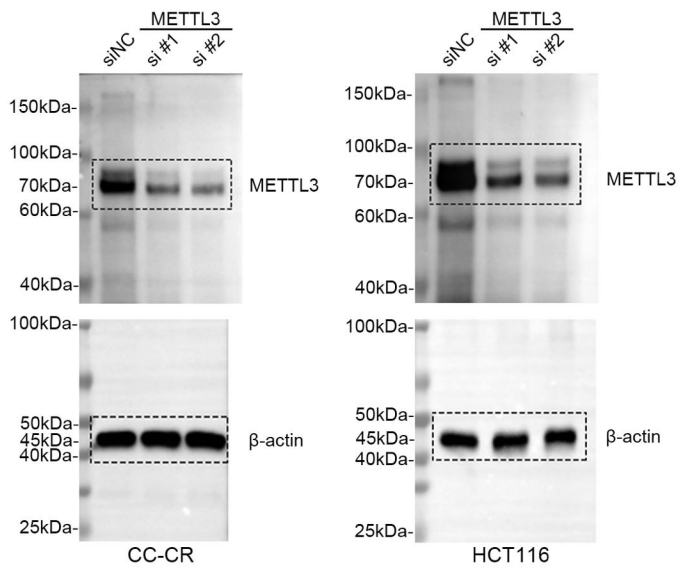

**Figure 6b**

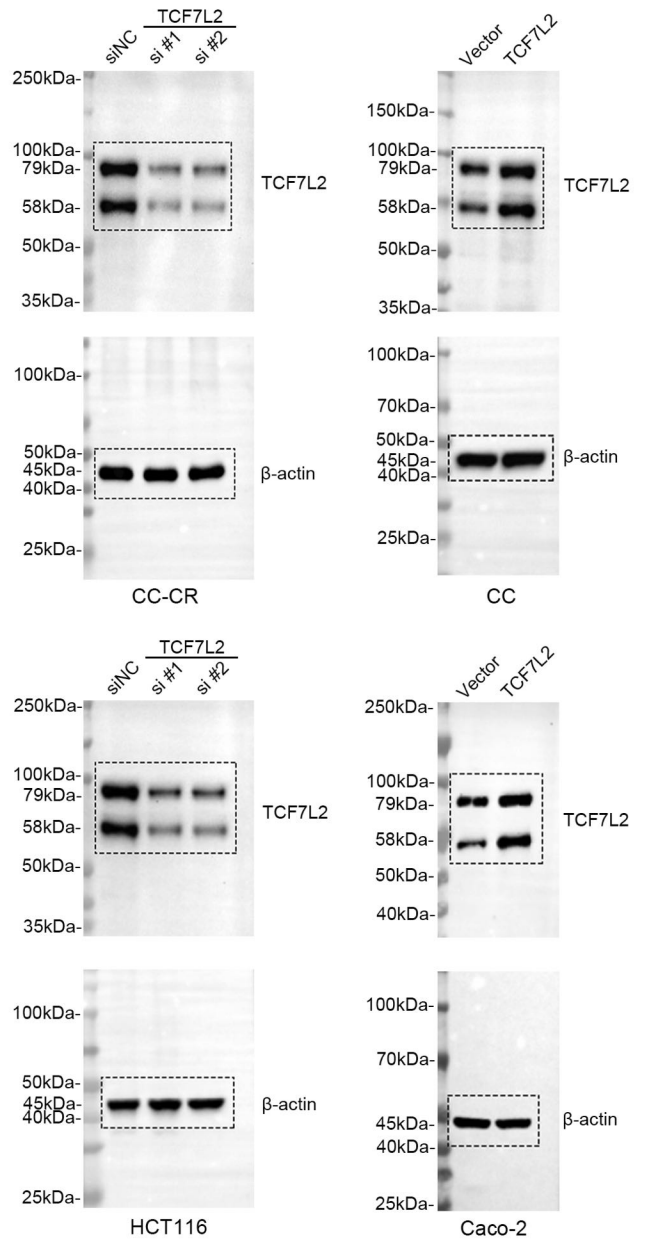

**Figure 5g**

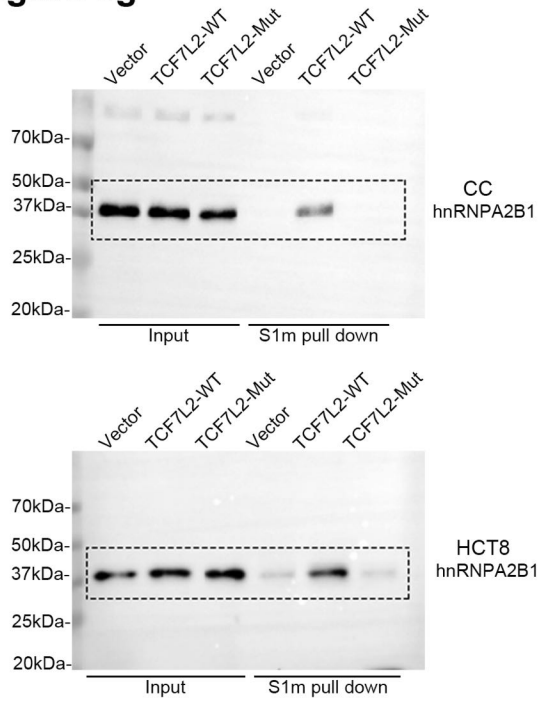

**Figure S3a**

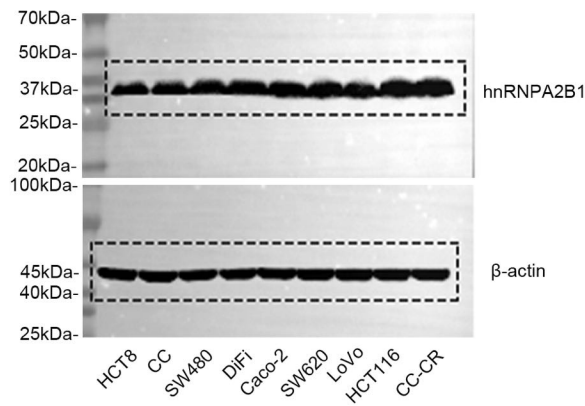

**Figure S4c**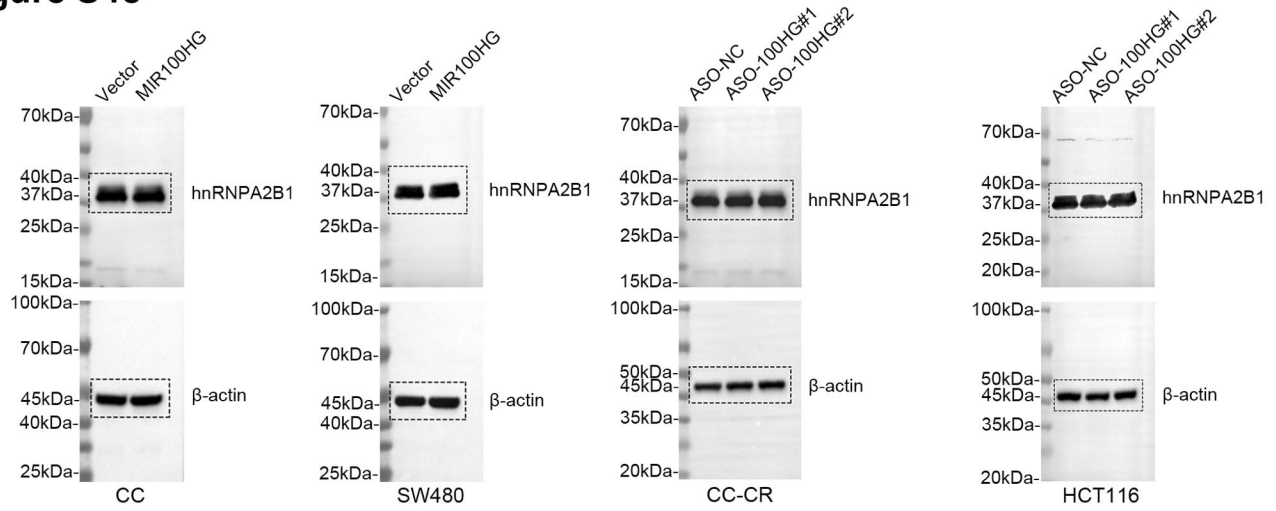**Figure S4d**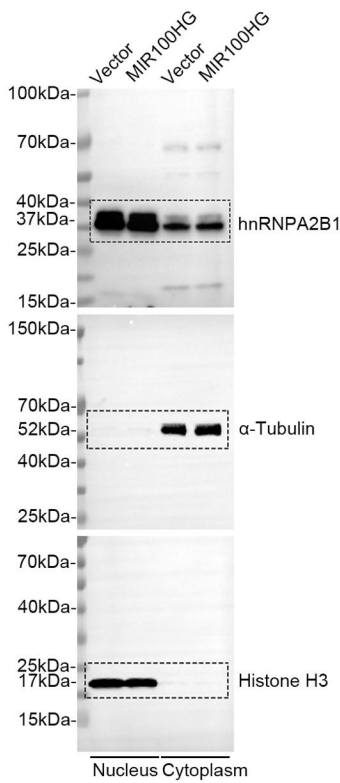**Figure S4e**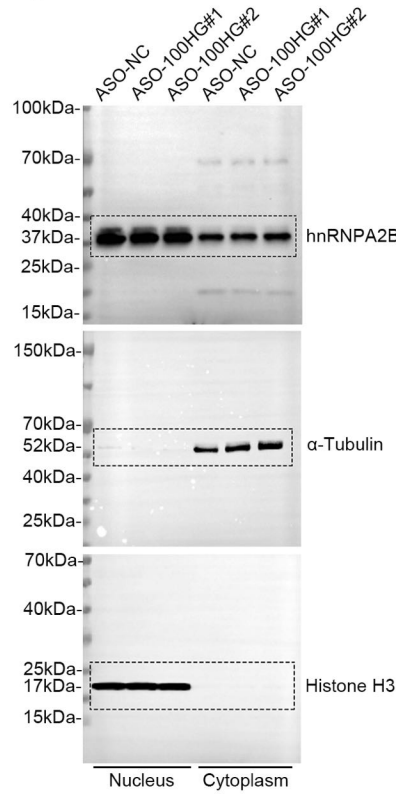**Figure S4f**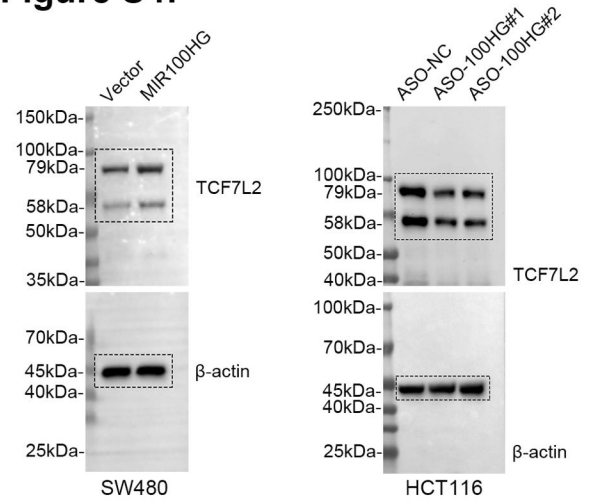**Figure S4g**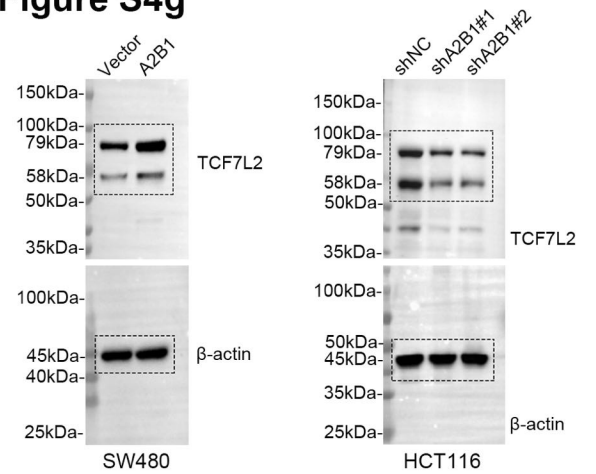**Figure S5b**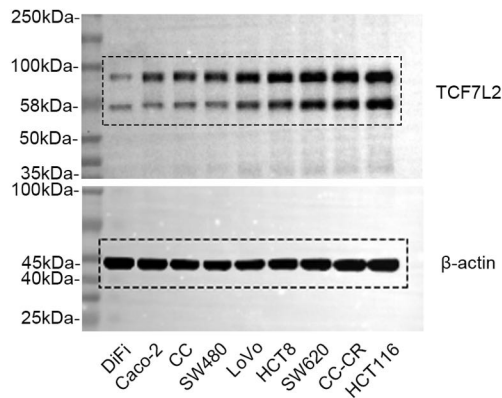

Supplement: 12943_2022_1555_MOESM2_ESM.pdf [file 12943_2022_1555_MOESM2_ESM.pdf]
